# Supplementary material for: Genetic continuity, isolation, and gene flow in Stone Age Central and Eastern Europe
Source: PubMed Central journal article supplement (PMC10412644; doi:10.1038/s42003-023-05131-3), 2023-08-09
Supplement: 42003_2023_5131_MOESM3_ESM.pdf [file 42003_2023_5131_MOESM3_ESM.pdf]

## Description of Additional Supplementary Files

**File name:** Supplementary Data 1

**Description:** Summary table for each sequenced individual describing sampling site, results of the radiocarbon dating, genome sequencing summary statistics, and contamination estimates

**File name:** Supplementary Data 2

**Description:** Information on sequencing libraries per individual

**File name:** Supplementary Data 3

**Description:** Description and SNP number information for ancient individuals (new and previously published) analyzed in this study

**File name:** Supplementary Data 4

**Description:** Mitochondrial mutation info for individuals sequenced in this study

**File name:** Supplementary Data 5

**Description:** Y chromosome variants for individuals sequenced in this study

**File name:** Supplementary Data 6

**Description:** qpAdm results for a set of European Mesolithic cline individuals

**File name:** Supplementary Data 7

**Description:** Results for WHG genetic and geographic distance regression analysis

**File name:** Supplementary Data 8

**Description:** qpAdm results for a ukr

**File name:** Supplementary Data 9

**Description:** f4 admixture test for ukr samples

**File name:** Supplementary Data 10

**Description:** qpAdm results for a ukr104

**File name:** Supplementary Data 11

**Description:** f4 and f4-ratio test for Neolithic Romanian and Polish samples

**File name:** Supplementary Data 12

**Description:** Kinship results for Ukrainian, Romanian and Polish samples

**File name:** Supplementary Data 13

**Description:** Y-chromosome mutation description for the Yasinovatka family samples

**File name:** Supplementary Data 14

**Description:** Paired individuals in conditional nucleotide diversity calculation

**File name:** Supplementary Data 15

**Description:** Extended info on radiocarbon datings and stable isotope values from human bone collagen for the Ukrainian samples, used in Supplementary Note 4

**File name:** Supplementary Data 16

**Description:** Summary of interpreted reservoir effect for the investigated individuals with or without  $\delta^{13}\text{C}$  and  $\delta^{15}\text{N}$  signatures.

**File name:** Supplementary Data 17

**Description:** Extended information on the radiocarbon dates and isotopic measurements for Romanian individuals.
