# Supplementary material for: Genetic continuity, isolation, and gene flow in Stone Age Central and Eastern Europe
Source: PubMed Central journal article supplement (PMC10412644; doi:10.1038/s42003-023-05131-3), 2023-08-09
Supplement: 42003_2023_5131_MOESM5_ESM.pdf [file 42003_2023_5131_MOESM5_ESM.pdf]

## Reporting Summary

Nature Portfolio wishes to improve the reproducibility of the work that we publish. This form provides structure for consistency and transparency in reporting. For further information on Nature Portfolio policies, see our [Editorial Policies](#) and the [Editorial Policy Checklist](#).

### Statistics

For all statistical analyses, confirm that the following items are present in the figure legend, table legend, main text, or Methods section.

n/a | Confirmed

- The exact sample size ( $n$ ) for each experimental group/condition, given as a discrete number and unit of measurement
- A statement on whether measurements were taken from distinct samples or whether the same sample was measured repeatedly
- The statistical test(s) used AND whether they are one- or two-sided  
*Only common tests should be described solely by name; describe more complex techniques in the Methods section.*
- A description of all covariates tested
- A description of any assumptions or corrections, such as tests of normality and adjustment for multiple comparisons
- A full description of the statistical parameters including central tendency (e.g. means) or other basic estimates (e.g. regression coefficient) AND variation (e.g. standard deviation) or associated estimates of uncertainty (e.g. confidence intervals)
- For null hypothesis testing, the test statistic (e.g.  $F$ ,  $t$ ,  $r$ ) with confidence intervals, effect sizes, degrees of freedom and  $P$  value noted  
*Give  $P$  values as exact values whenever suitable.*
- For Bayesian analysis, information on the choice of priors and Markov chain Monte Carlo settings
- For hierarchical and complex designs, identification of the appropriate level for tests and full reporting of outcomes
- Estimates of effect sizes (e.g. Cohen's  $d$ , Pearson's  $r$ ), indicating how they were calculated

*Our web collection on [statistics for biologists](#) contains articles on many of the points above.*

### Software and code

Policy information about [availability of computer code](#)

Data collection

Data analysis

pong v. 1.4.7  
 AdmixTools v. 20160803 (Covertf)  
 Admixr v. 0.7.1  
 R v. 3.6.1 or 3.6.2 as described in materials and methods  
 qpAdm v. 401  
 qpGraph v. 6100  
 ArcGIS pro 2.7.0

For manuscripts utilizing custom algorithms or software that are central to the research but not yet described in published literature, software must be made available to editors and reviewers. We strongly encourage code deposition in a community repository (e.g. GitHub). See the Nature Portfolio [guidelines for submitting code & software](#) for further information.

## Data

Policy information about [availability of data](#)

All manuscripts must include a [data availability statement](#). This statement should provide the following information, where applicable:

- Accession codes, unique identifiers, or web links for publicly available datasets
- A description of any restrictions on data availability
- For clinical datasets or third party data, please ensure that the statement adheres to our [policy](#)

The sequence data used in this study will be available from the European Nucleotide Archive under the project PRJEB59598

## Human research participants

Policy information about [studies involving human research participants and Sex and Gender in Research](#).

|                             |                                                                                                      |
|-----------------------------|------------------------------------------------------------------------------------------------------|
| Reporting on sex and gender | N/A                                                                                                  |
| Population characteristics  | Public population genetic data is used, and population identifiers follow the original publications. |
| Recruitment                 | N/A                                                                                                  |
| Ethics oversight            | N/A                                                                                                  |

Note that full information on the approval of the study protocol must also be provided in the manuscript.

## Field-specific reporting

Please select the one below that is the best fit for your research. If you are not sure, read the appropriate sections before making your selection.

- Life sciences       Behavioural & social sciences       Ecological, evolutionary & environmental sciences

For a reference copy of the document with all sections, see [nature.com/documents/nr-reporting-summary-flat.pdf](https://www.nature.com/documents/nr-reporting-summary-flat.pdf)

## Ecological, evolutionary & environmental sciences study design

All studies must disclose on these points even when the disclosure is negative.

|                          |                                                                                                                                                                                                                                                                                                                                                                                             |
|--------------------------|---------------------------------------------------------------------------------------------------------------------------------------------------------------------------------------------------------------------------------------------------------------------------------------------------------------------------------------------------------------------------------------------|
| Study description        | Investigation of genetic relationships among pre-historic humans using ancient DNA technology.                                                                                                                                                                                                                                                                                              |
| Research sample          | 56 human remains from the Mesolithic, Neolithic and Eneolithic across Central and Eastern Europe                                                                                                                                                                                                                                                                                            |
| Sampling strategy        | We sampled available material from museum collections                                                                                                                                                                                                                                                                                                                                       |
| Data collection          | The following co-authors collected the samples at the museums and brought the samples to Uppsala U: Anna Juras, Łukasz Pospieszny, Mihai Constantinescu, Mihai Rotea, Stanisław Wilk, Jerzy Łapo, Inna Potekhina, Andrei Soficaru, Marzena Szmyt, Alexey G. Nikitin. Upon arrival, the samples were given a lab-code number that follow the samples all the way to sequencing and analysis. |
| Timing and spatial scale | 2014-2017.                                                                                                                                                                                                                                                                                                                                                                                  |
| Data exclusions          | Samples with poor DNA preservation were excluded. The procedure is described in the supplement.                                                                                                                                                                                                                                                                                             |
| Reproducibility          | The data is available and the population genomic tools are also available to reproduce the results.                                                                                                                                                                                                                                                                                         |
| Randomization            | This is a population genomic study of human relationships. Uncertainties are quantified using various statistical procedures.                                                                                                                                                                                                                                                               |

Blinding

Initial population genomic analyses are blind in that individuals' identifiers are ignored (such as time period or archaeological context). Based on initial (blind) analyses, formal hypotheses are formed and tested.

Did the study involve field work?  Yes  No

## Reporting for specific materials, systems and methods

We require information from authors about some types of materials, experimental systems and methods used in many studies. Here, indicate whether each material, system or method listed is relevant to your study. If you are not sure if a list item applies to your research, read the appropriate section before selecting a response.

### Materials & experimental systems

| n/a                                 | Involved in the study                                             |
|-------------------------------------|-------------------------------------------------------------------|
| <input checked="" type="checkbox"/> | <input type="checkbox"/> Antibodies                               |
| <input checked="" type="checkbox"/> | <input type="checkbox"/> Eukaryotic cell lines                    |
| <input type="checkbox"/>            | <input checked="" type="checkbox"/> Palaeontology and archaeology |
| <input checked="" type="checkbox"/> | <input type="checkbox"/> Animals and other organisms              |
| <input checked="" type="checkbox"/> | <input type="checkbox"/> Clinical data                            |
| <input checked="" type="checkbox"/> | <input type="checkbox"/> Dual use research of concern             |

### Methods

| n/a                                 | Involved in the study                           |
|-------------------------------------|-------------------------------------------------|
| <input checked="" type="checkbox"/> | <input type="checkbox"/> ChIP-seq               |
| <input checked="" type="checkbox"/> | <input type="checkbox"/> Flow cytometry         |
| <input checked="" type="checkbox"/> | <input type="checkbox"/> MRI-based neuroimaging |

## Palaeontology and Archaeology

Specimen provenance

Specimen deposition

Dating methods

Tick this box to confirm that the raw and calibrated dates are available in the paper or in Supplementary Information.

Ethics oversight

Note that full information on the approval of the study protocol must also be provided in the manuscript.
